# Supplementary material for: Efficient Photocatalytic Hydrogen Production over NiS-Modified Cadmium and Manganese Sulfide Solid Solutions
Source: MDPI journal article supplement (doi:10.3390/ma15228026), 2022-11-14
Supplement: s1 [file s1]

# Supporting Information

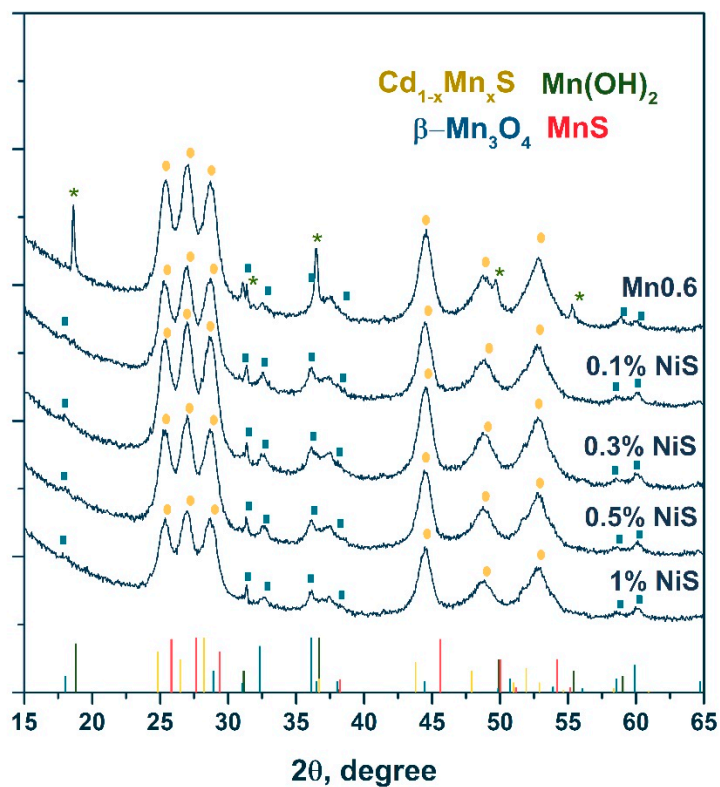

**Figure S1.** XRD patterns of the NiS/Mn0.6 HT120 samples.

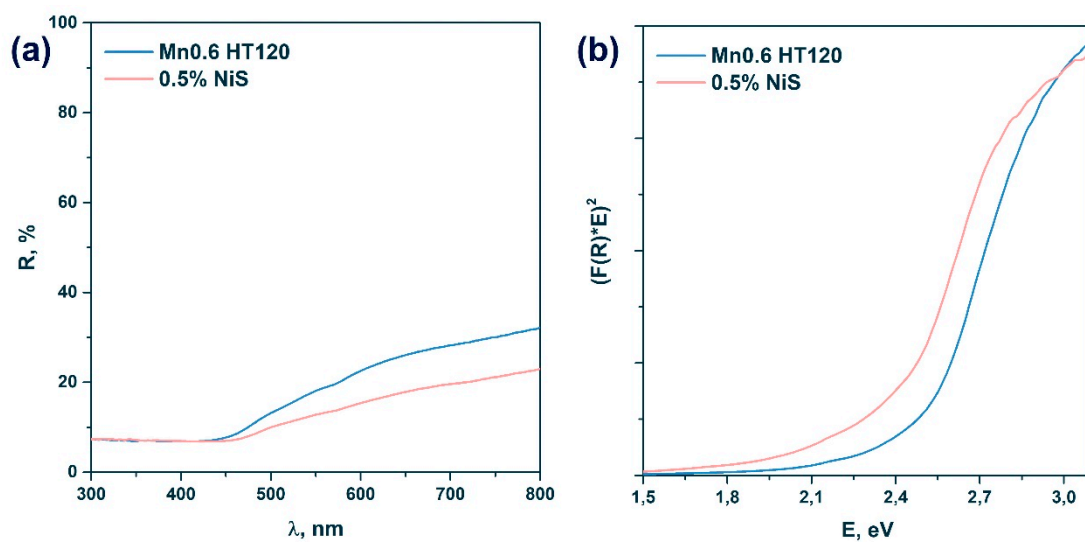

**Figure S2.** Diffuse reflectance spectra (a) and Tauc's plot (b) of the NiS/Mn0.6 HT120 samples

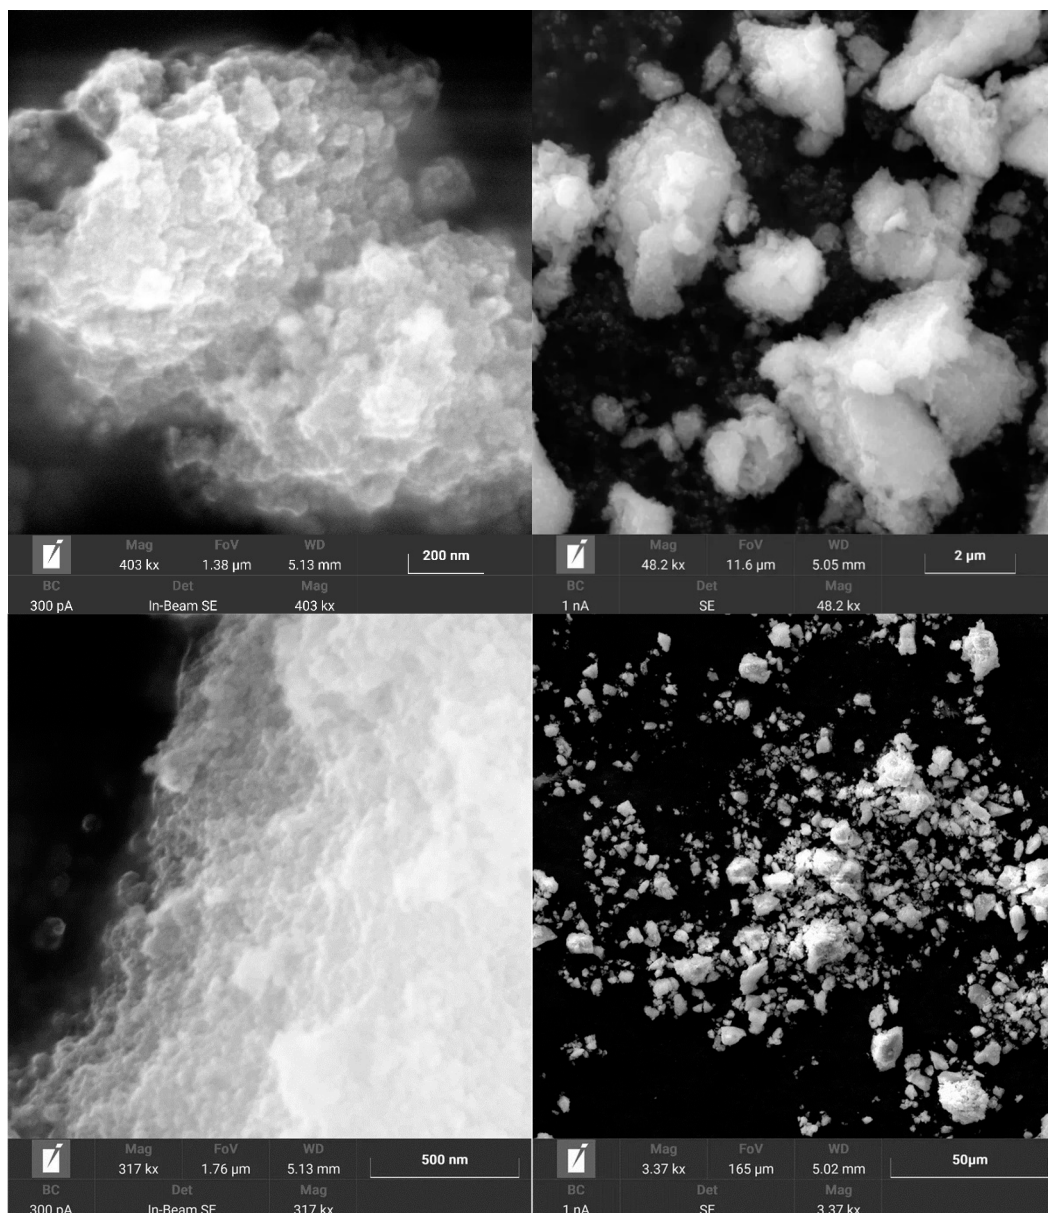

**Figure S3.** Focused ion beam FE-SEM images of 0.1% NiS/Mn<sub>0.6</sub> HT120 photocatalyst.
